# Supplementary material
Source: PubMed Central journal article supplement (PMC3625310)
Supplement: 1220927110_pnas.201220927SI.pdf [file 1220927110_pnas.201220927SI.pdf]

# Supporting Information

Joo et al. 10.1073/pnas.1220927110

## SI Materials and Methods

**siRNAs.** The following siRNAs were used: coiled-coil domain containing 41 (CCDC41)-1, AGGUGAAGUUGGUGACUCA; CCDC41-2, GGAACUAGUUAGAGUCAAG; CCDC41-3, GGAAACAACUUGCUCGAGAA; Cep164, GAGUGAAGGUGUAUCGCUU (1); intraflagellar transport protein 20 (IFT20), CAGCAACUUCAAGCCCUGAAUA (2); intraflagellar transport protein 88 (IFT88)-1, CGACUAAGUGCCAGACUCAUU (3); IFT88-2, CCGAAGCACUUAACACUUA (3); and centriolar coiled-coil protein 110 (CP110), AAGCAGCAUGAGUAUGCCAGU (4).

Individual CCDC41 siRNAs were used for the experiments shown in Fig. 2A and B. For the other experiments, CCDC41-1 and CCDC41-2 siRNAs were used as a pool, and the total siRNA concentration was 10 nM. IFT88-1 and IFT88-2 siRNAs were also used as a pool.

**Antibodies.** The following antibodies were used: rabbit anti-CCDC41 (Sigma), mouse anti- $\gamma$ -tubulin (Abcam), mouse anti-

glutamylated-tubulin (Adipogen), rabbit anti-centrosomal protein 164 (Cep164) (gift from Erich Nigg, University of Basel, Basel, Switzerland), mouse anti-outer dense fiber of sperm tails 2 (Odf2) (Abnova), mouse anti-Ninein (Millipore), rabbit anti-centrosomal protein 97 (Cep97) (Novus), rabbit anti-ADP-ribosylation factor-like 13b (Arl13b) (Proteintech), rabbit anti-IFT20 (Proteintech), rabbit anti-CP110 (Proteintech), mouse anti-acetylated-tubulin (Sigma), mouse anti- $\alpha$ -tubulin (Sigma), rabbit anti-green fluorescent protein (GFP) (Abcam), rabbit anti-tectonic family member 1 (TCTN1) (Proteintech), rabbit anti-IFT88 (Proteintech), mouse anti-Giantin (Abcam), and mouse and rabbit anti-FLAG (Sigma).

**Imaging.** Images were obtained using a DeltaVision Deconvolution System equipped with a cooled CCD camera (Applied Precision). Image stacks were collected with a z-step size of 0.2  $\mu$ m and deconvolved with DeltaVision software. One deconvolved image from each image stack was presented in the figures without z-plane projection.

1. Graser S, et al. (2007) Cep164, a novel centriole appendage protein required for primary cilium formation. *J Cell Biol* 179(2):321–330.
2. Inoko A, et al. (2012) Trichoplein and Aurora A block aberrant primary cilia assembly in proliferating cells. *J Cell Biol* 197(3):391–405.

3. Robert A, et al. (2007) The intraflagellar transport component IFT88/Polaris is a centrosomal protein regulating G1-S transition in non-ciliated cells. *J Cell Sci* 120:628–637.
4. Spektor A, Tsang WY, Khoo D, Dynlacht BD (2007) Cep97 and CP110 suppress a cilia assembly program. *Cell* 130(4):678–690.

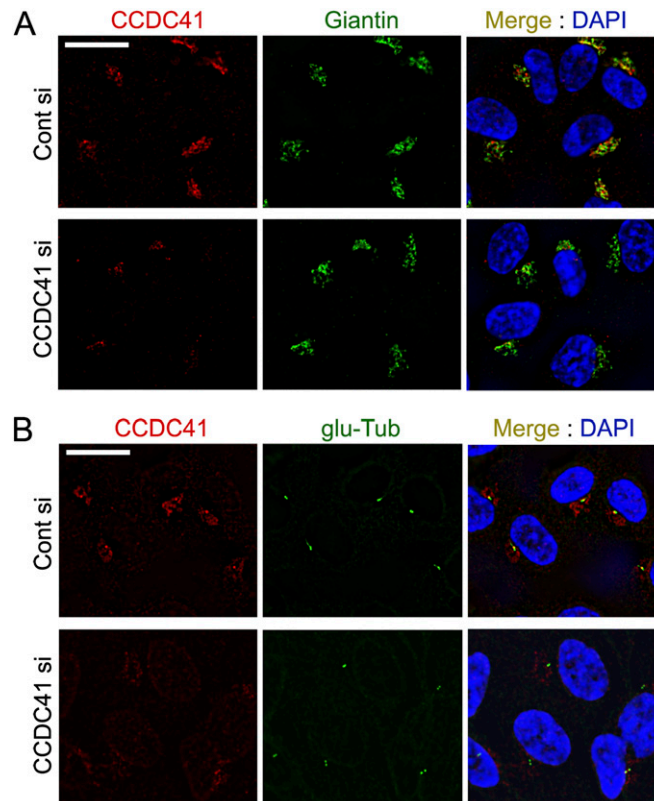

**Fig. S1.** Confirmation of Golgi and centriolar localization of CCDC41. (A) RPE1 cells were transfected with siRNAs for 2.5 d and double-stained with anti-CCDC41 and anti-Giantin antibodies. (B) RPE1 cells were transfected with siRNAs for 2.5 d (cells were serum-starved for the final 24 h), and double-stained with anti-CCDC41 and anti-glu-Tub antibodies. (Scale bars: 15  $\mu$ m.)

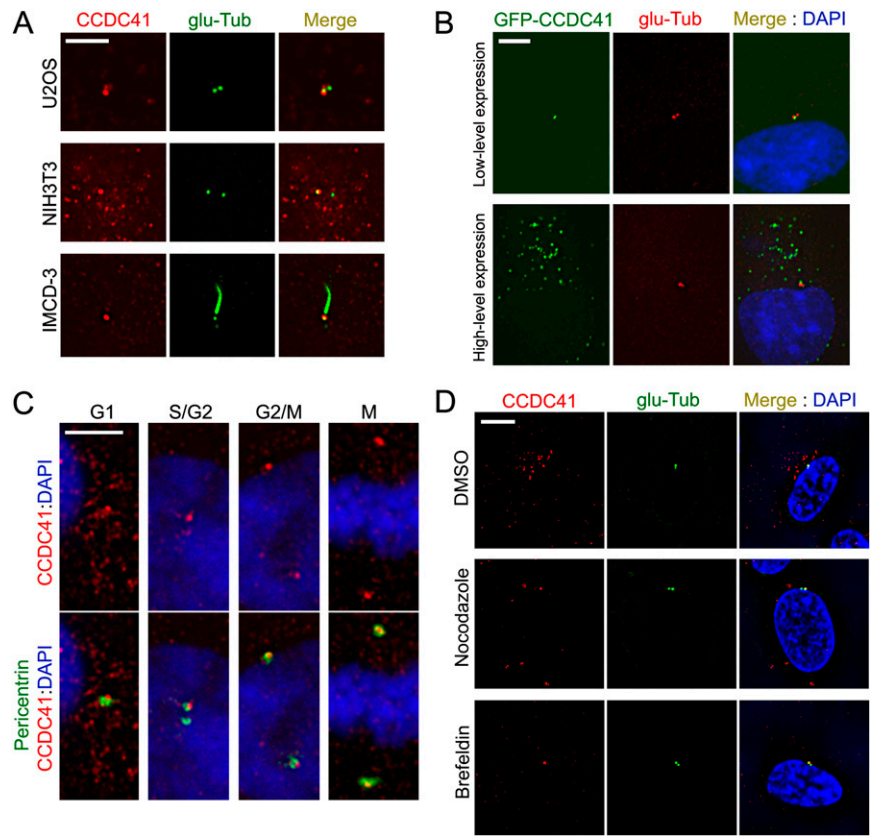

**Fig. S2.** Centriolar association of CCDC41. (A) U2OS, NIH 3T3, and IMCD-3 cells were double-stained with anti-CCDC41 and anti-glu-Tub antibodies. (B) RPE1 cells were transfected with GFP-CCDC41 plasmid for 8 h (*Upper*) or 16 h (*Lower*). Cells expressing high levels of GFP-CCDC41 display extracentrosomal GFP-CCDC41 accumulations. (C) CCDC41 localizes to centrioles in RPE1 cells at all stages of the cell cycle. Increasing levels of CCDC41 immunoreactivity were observed in a second parental centriole at the onset of centrosome separation. (D) RPE1 cells were treated with DMSO, nocodazole (3  $\mu$ g/mL), or brefeldin A (1.4  $\mu$ g/mL) for 2 h, and double-stained with anti-CCDC41 and anti-glu-Tub antibodies. (Scale bars: A–C, 5  $\mu$ m; D, 10  $\mu$ m.)

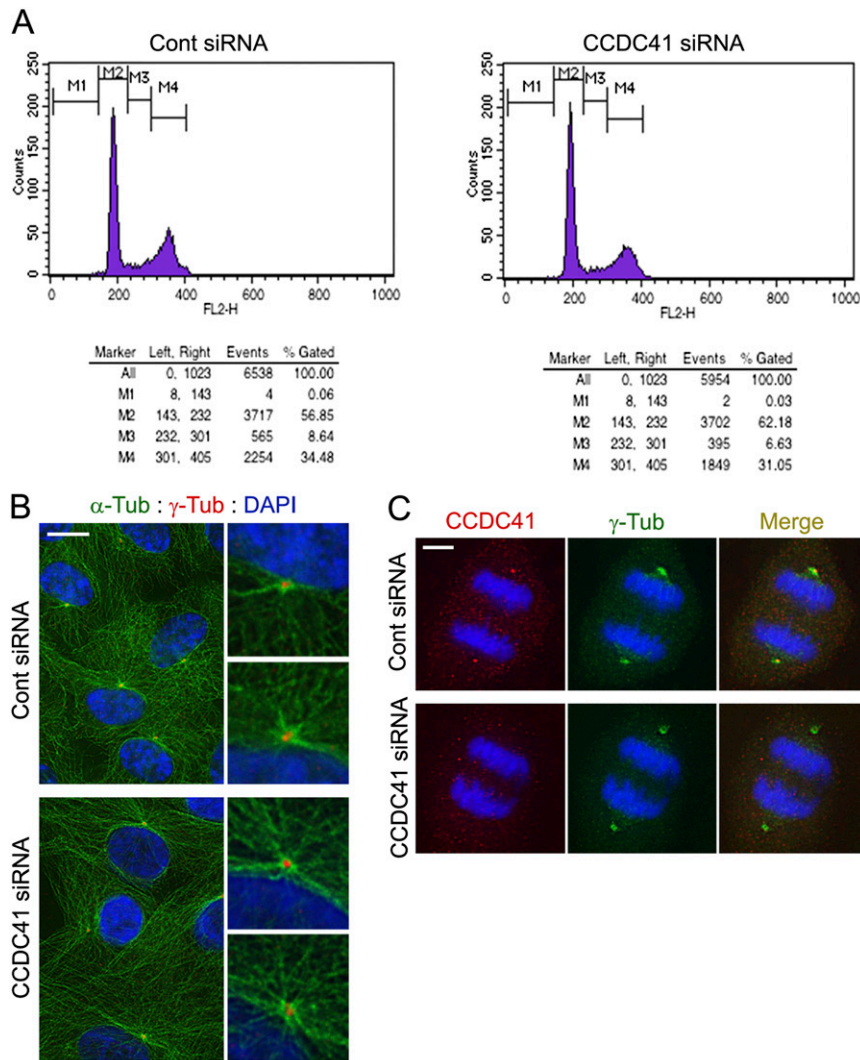

**Fig. 53.** CCDC41 is dispensable for cell cycle progression and microtubule organization. (A) RPE1 cells were transfected with the indicated siRNAs, and analyzed by flow cytometry. (B) RPE1 cells were transfected with siRNAs for 3 d and double-stained with anti- $\alpha$ -Tub and anti- $\gamma$ -Tub antibodies. (C) RPE1 cells were transfected with siRNAs for 3 d and double-stained with anti-CCDC41 and anti- $\gamma$ -Tub antibodies. (Scale bars: B, 10  $\mu$ m; C, 5  $\mu$ m.)

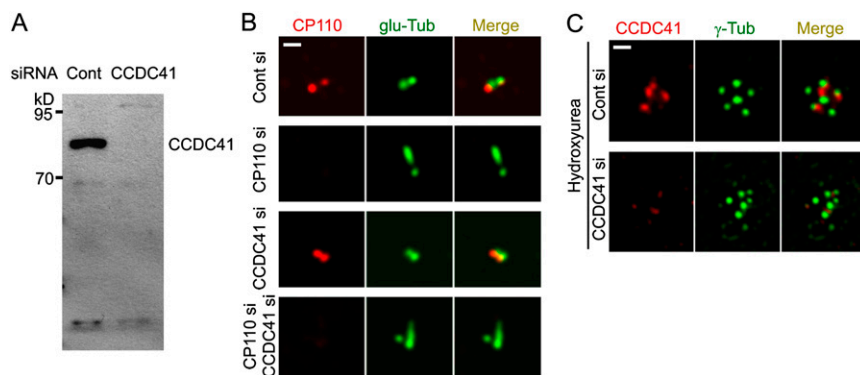

**Fig. 54.** CCDC41 is dispensable for centriole biogenesis and elongation in U2OS cells. (A) Western blot illustrating an efficient depletion of CCDC41 in U2OS cells. (B) U2OS cells were transfected with the indicated siRNAs for 3 d and double-stained with anti-CP110 and anti-glu-Tub antibodies. Note that CP110 depletion can induce abnormal centriole elongation in the absence of CCDC41. (C) U2OS cells were transfected with siRNAs, treated with hydroxyurea (4 mM) for 48 h, and double-stained with anti-CCDC41 and anti- $\gamma$ -Tub antibodies. (Scale bars: B and C, 1  $\mu$ m.)

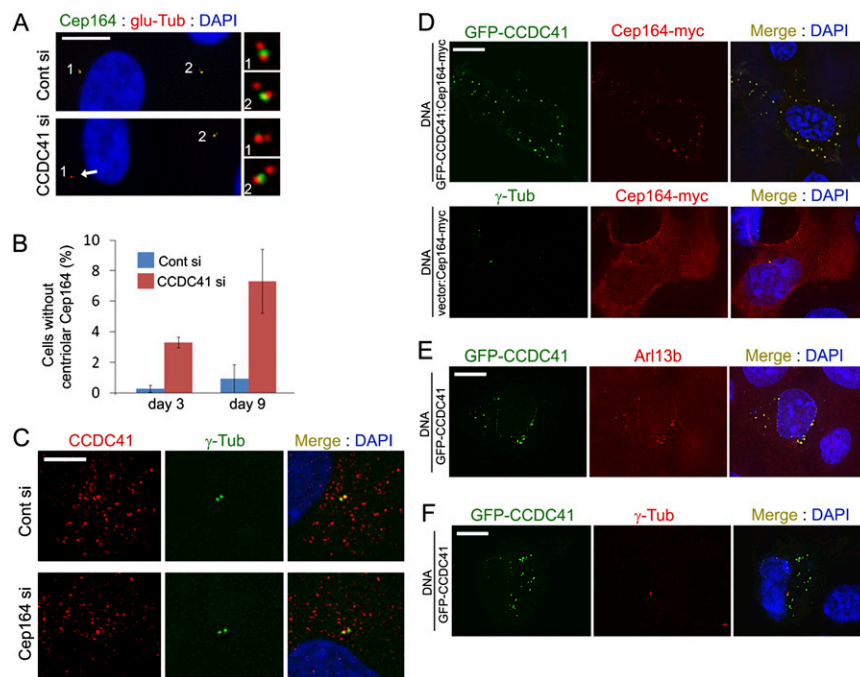

**Fig. S5.** Potential interaction between CCDC41 and Cep164. (A) Centriolar Cep164 staining was not detected in a small fraction of RPE1 cells transfected with CCDC41 siRNAs for 3 d without serum starvation. Arrow indicates a centrosome without Cep164 staining (B) Quantification of the percentage of cells that do not exhibit centriolar Cep164 staining. For 9-d experiments, siRNAs were repeatedly transfected at days 0, 3, and 6. (C) RPE1 cells were transfected with Cep164 siRNA for 3 d and double-stained with anti-CCDC41 and anti- $\gamma$ -Tub antibodies. (D) RPE1 cells were cotransfected with GFP-CCDC41 and Cep164-myc for 8 h and stained with anti-myc antibody. (E) RPE1 cells were transfected with GFP-CCDC41 plasmid for 16 h and stained with anti-Arl13b antibody. (F) RPE1 cells were transfected with GFP-CCDC41 for 8 h and stained with anti- $\gamma$ -Tub antibody. (Scale bars: A and D–F, 10  $\mu$ m; C, 5  $\mu$ m.)

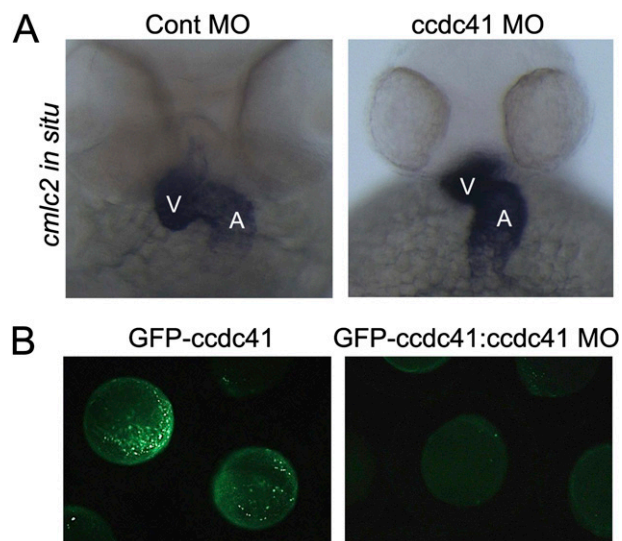

**Fig. S6.** Efficiency test of *ccdc41* knockdown in zebrafish. (A) Morpholino-mediated knockdown of *ccdc41* does not affect left/right body patterning. A, atrium; *cmlc2*, heart marker; V, ventricle. (B) Fluorescence image of zebrafish embryos coinjected with GFP-*ccdc41* reporter vector and *ccdc41* morpholino (MO). Note the absence of detectable GFP fluorescence in *ccdc41* morpholino-injected embryos.

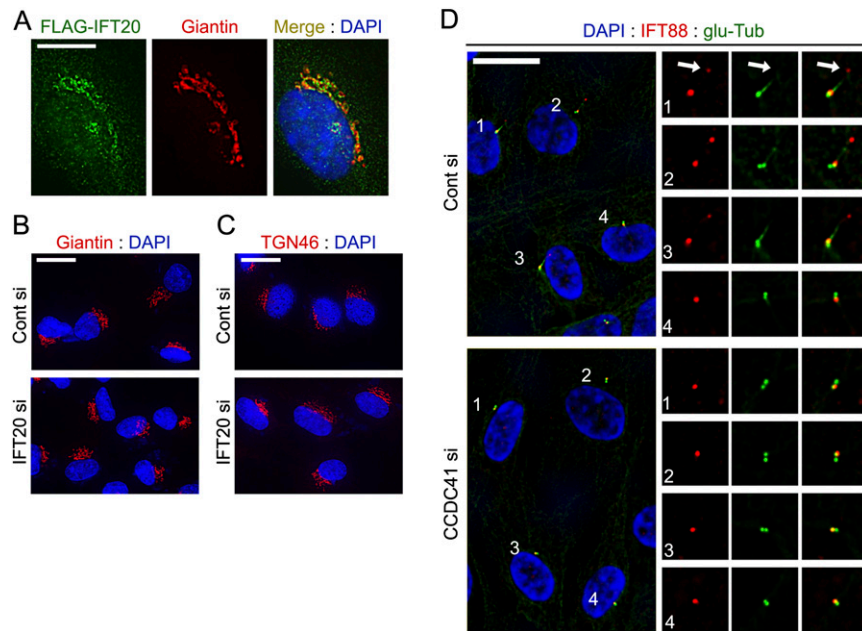

**Fig. 57.** IFT20 depletion does not affect the integrity of the Golgi complex, and CCDC41 depletion does not affect IFT88 recruitment to the centriole. (A) RPE1 cells were transfected with FLAG-IFT20 for 16 h and double-stained with anti-FLAG and anti-Giantin antibodies. (B and C) RPE1 cells were transfected with siRNAs for 3 d and stained with indicated antibodies. (D) CCDC41 depletion does not affect IFT88 recruitment to the centriole. RPE1 cells were transfected with siRNAs for 3 d (cells were serum-starved for the final 24 h) and double-stained with anti-IFT88 and anti-glu-Tub antibodies. Arrows indicate IFT88 accumulation at the distal tip of cilia. (Scale bars: A, 10  $\mu\text{m}$ ; B–D, 20  $\mu\text{m}$ .)

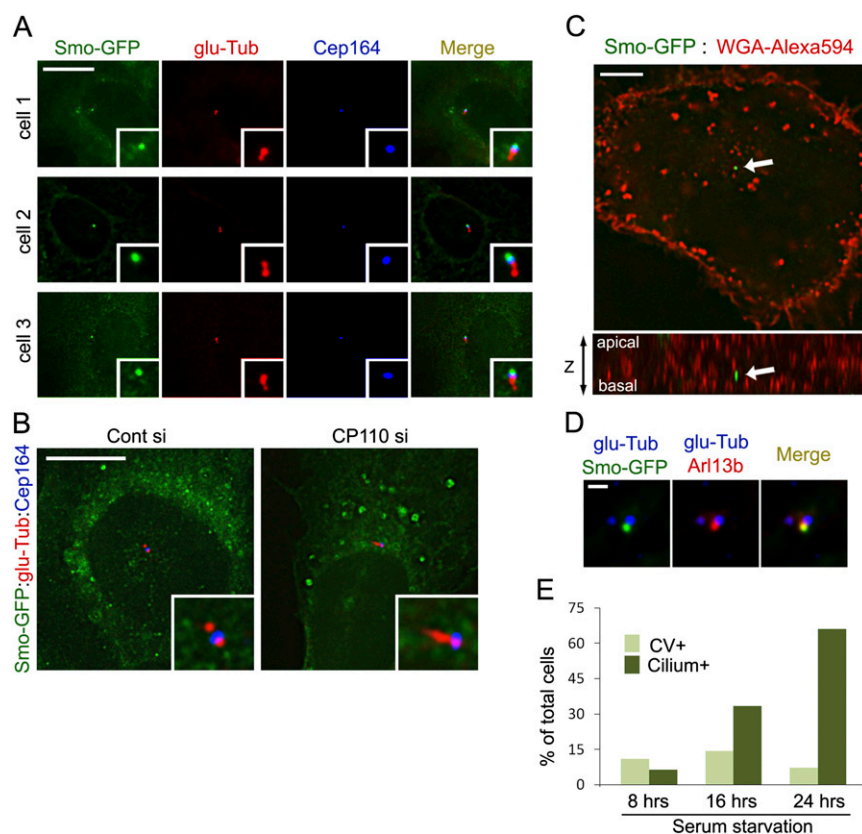

**Fig. 58.** Detection of the primary ciliary vesicle using Smo-GFP as a marker. (A) RPE1-SmoGFP cells were serum-starved for 16 h and double-stained with anti-Cep164 and anti-glu-Tub antibodies. (B) U2OS cells stably expressing Smo-GFP were transfected with CP110 siRNA for 3 d (cells were serum-starved for the final 24 h) and double-stained with anti-Cep164 and anti-glu-Tub antibodies. (C) Living RPE1-SmoGFP cells were labeled with WGA-Alexa 594 (5  $\mu$ g/mL) for 10 min, washed with PBS solution, and imaged without fixation. Image stacks were collected with a z-step size of 0.2  $\mu$ m and deconvolved, and 3D rotation was performed with DeltaVision software. Arrow indicates the presumptive primary ciliary vesicle exhibiting Smo-GFP fluorescence. (D) RPE1-SmoGFP cells were serum-starved for 16 h and double-stained with anti-Arl13b and anti-glu-Tub antibodies. (E) RPE1-SmoGFP cells were serum starved for the indicated hours, and stained with anti-glu-Tub antibody. More than 300 cells from each time point were analyzed. (Scale bars: A and B, 10  $\mu$ m; C, 5  $\mu$ m; D, 1  $\mu$ m.)

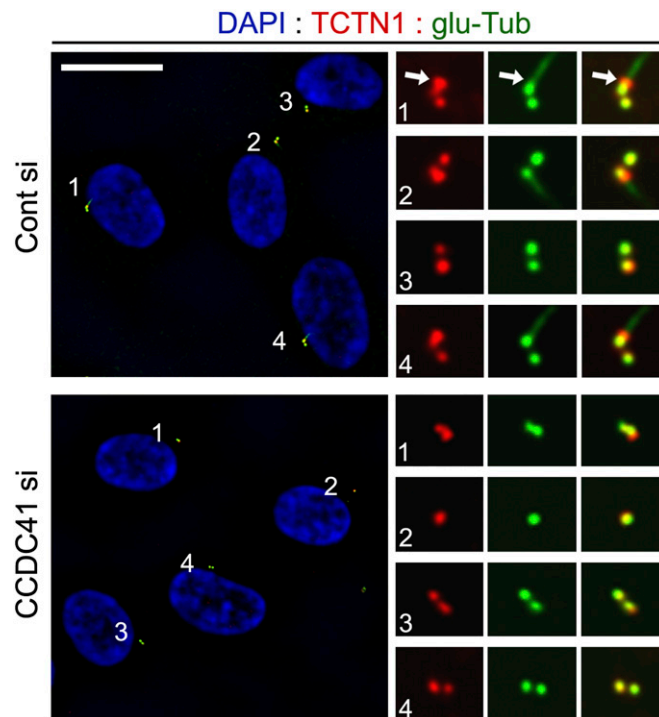

**Fig. S9.** CCDC41 is required for transition zone formation. RPE1 cells were transfected with siRNAs for 3 d (cells were serum-starved for the final 24 h) and double-stained with anti-TCTN1 and anti-glu-Tub antibodies. Arrows indicate the transition zone of cilia. (Scale bar: 20  $\mu$ m.)
